# Supplementary material for: A highly sensitive LC-MS/MS method for quantification of AB-38b in rat plasma, liver and kidney tissues: application to a pharmacokinetic study
Source: Royal Society of Chemistry journal article supplement (doi:10.1039/d5ay01136a), 2026-01-01
Supplement: d5ay01136a1.pdf [file d5ay01136a1.pdf]

## Supplementary Materials for

### **A highly sensitive LC-MS/MS method for quantification of AB-38b in rat plasma, liver and kidney tissue: Application to a pharmacokinetic study**

Dandan Pan<sup>a1</sup>, Libang Chen<sup>a1</sup>, Haonan Luo<sup>a</sup>, Haiyan Liu<sup>d</sup>, Weihao Chen<sup>a</sup>, Zhenzhou Jiang<sup>c</sup>, Zhen Qiu<sup>a</sup>, Nan Zhou<sup>a</sup>, Yequan Zhou<sup>a</sup>, Qiujin Xu<sup>c</sup>, Tao Wang<sup>a, b\*</sup>, Qian Lu<sup>a\*</sup>, Tingting Yang<sup>a\*</sup>

<sup>a</sup>Jiangsu Key Laboratory of New Drug Research and Clinical Pharmacy, Xuzhou Medical University, Xuzhou 221004, China

<sup>b</sup>Department of Pharmacy, The affiliated hospital of Xuzhou Medical University, Xuzhou 221006, China

<sup>c</sup>New Drug Screening Center, Jiangsu Center for Pharmacodynamics Research and Evaluation, China Pharmaceutical University, Nanjing 210009, China

<sup>d</sup>Hunan Creates Med Technology Co., Ltd, Changsha 410205, China

<sup>e</sup>Phase I Clinical Research Center, Xuzhou Central Hospital, Xuzhou 221009, China

\*Corresponding author:

Tao Wang

Jiangsu Key Laboratory of New Drug Research and Clinical Pharmacy, Xuzhou Medical University, NO. 209. Tongshan Road, Xuzhou, Jiangsu 221004, China.

Department of Pharmacy, The affiliated hospital of Xuzhou Medical University, Xuzhou 221006, China

E-mail addresses: Misswt2011@126.com

Qian Lu

Department of Clinical Pharmacology, School of Pharmacy, Xuzhou Medical University, NO. 209. Tongshan Road, Xuzhou, Jiangsu 221004, China.

E-mail addresses: prairy@126.com

Tingting Yang

Department of Clinical Pharmacology, School of Pharmacy, Xuzhou Medical University, NO. 209.

Tongshan Road, Xuzhou, Jiangsu 221004, China.

E-mail addresses: [tty@xzhmu.edu.cn](mailto:tty@xzhmu.edu.cn); nanjing\_cpu@126.com

<sup>1</sup>These authors equally contributed to this work.

\*These authors contributed equally to this work.

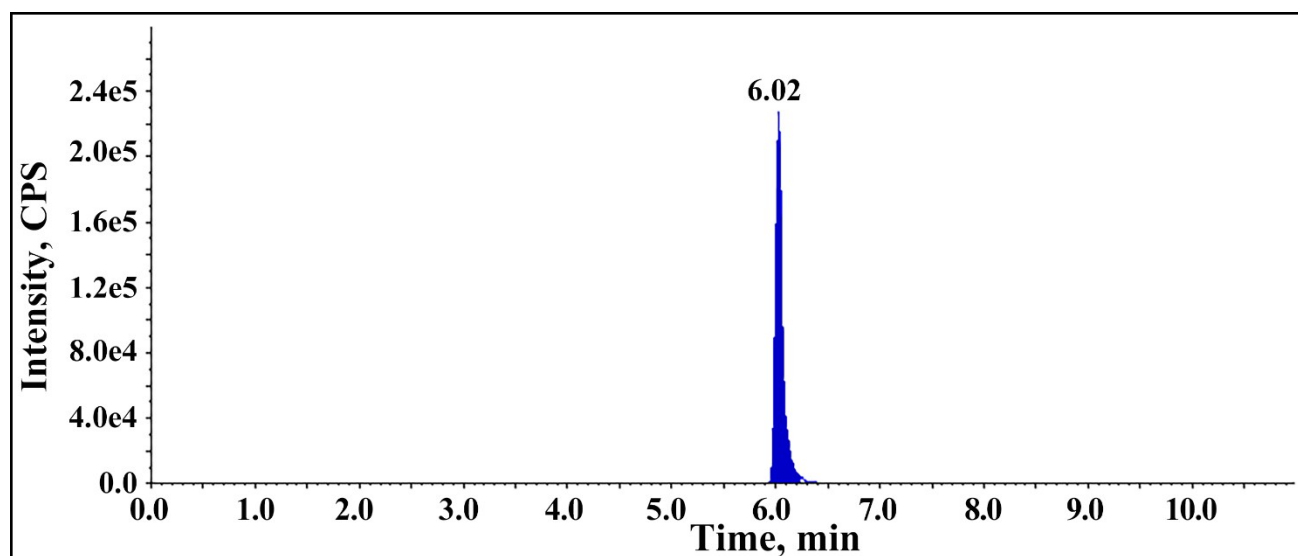

**Figure. S1.** The chromatogram of AB-38b for purity determination.

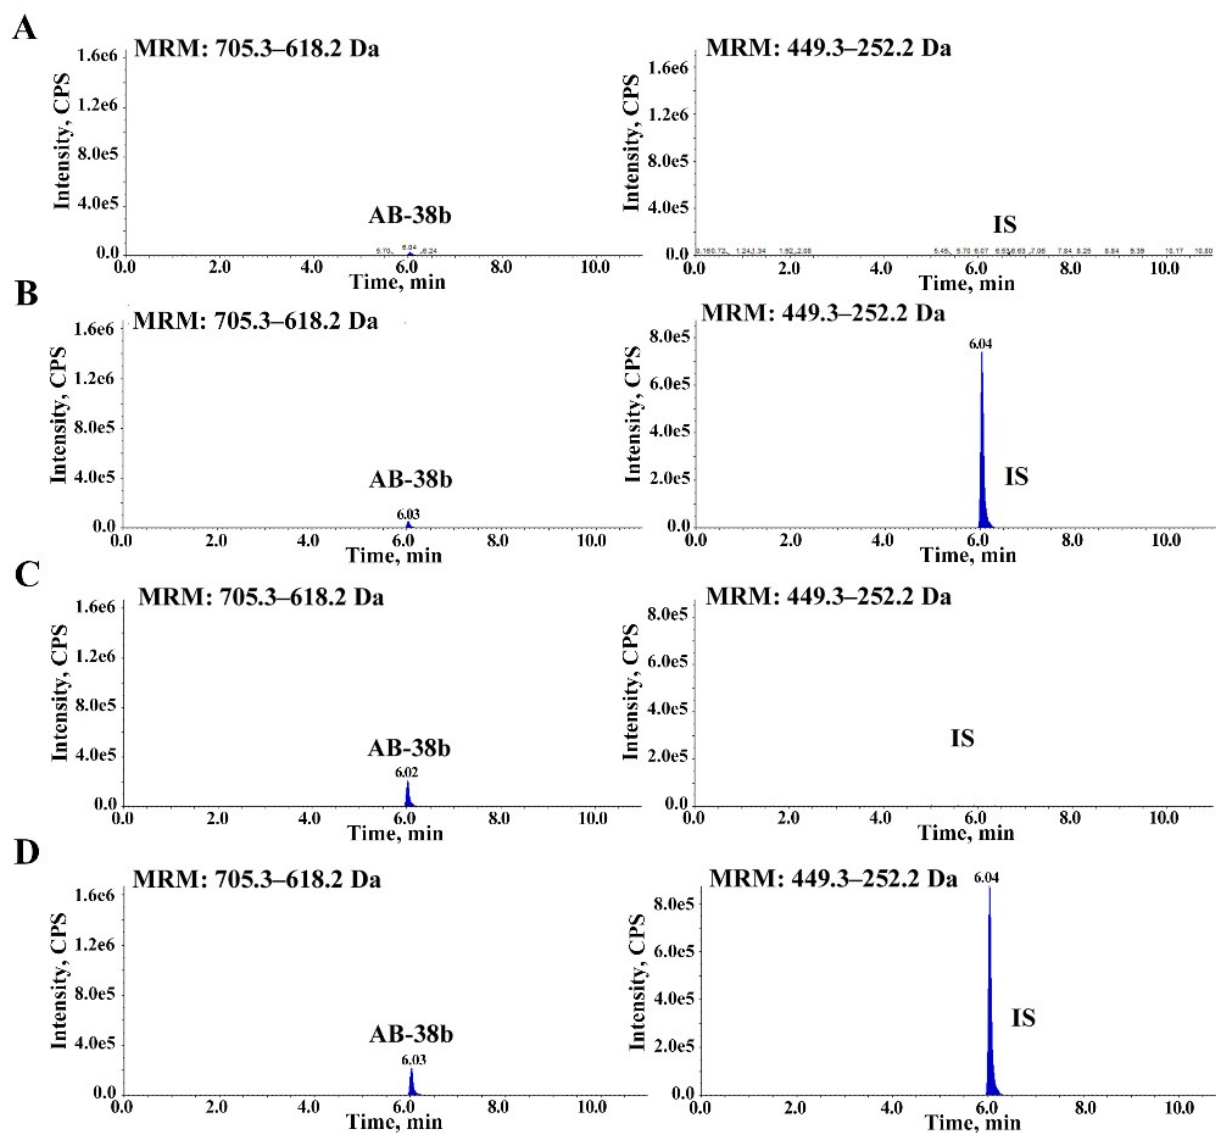

**Figure. S2 Typical MRM chromatogram of AB-38b and IS (Tolvaptan) in the liver of rats.** (A) A double blank sample; (B) A zero sample (blank sample spiked with IS); (C) Liver tissue homogenate sample spiked with AB-38b; (D) AB-38b at LLOQ with IS.

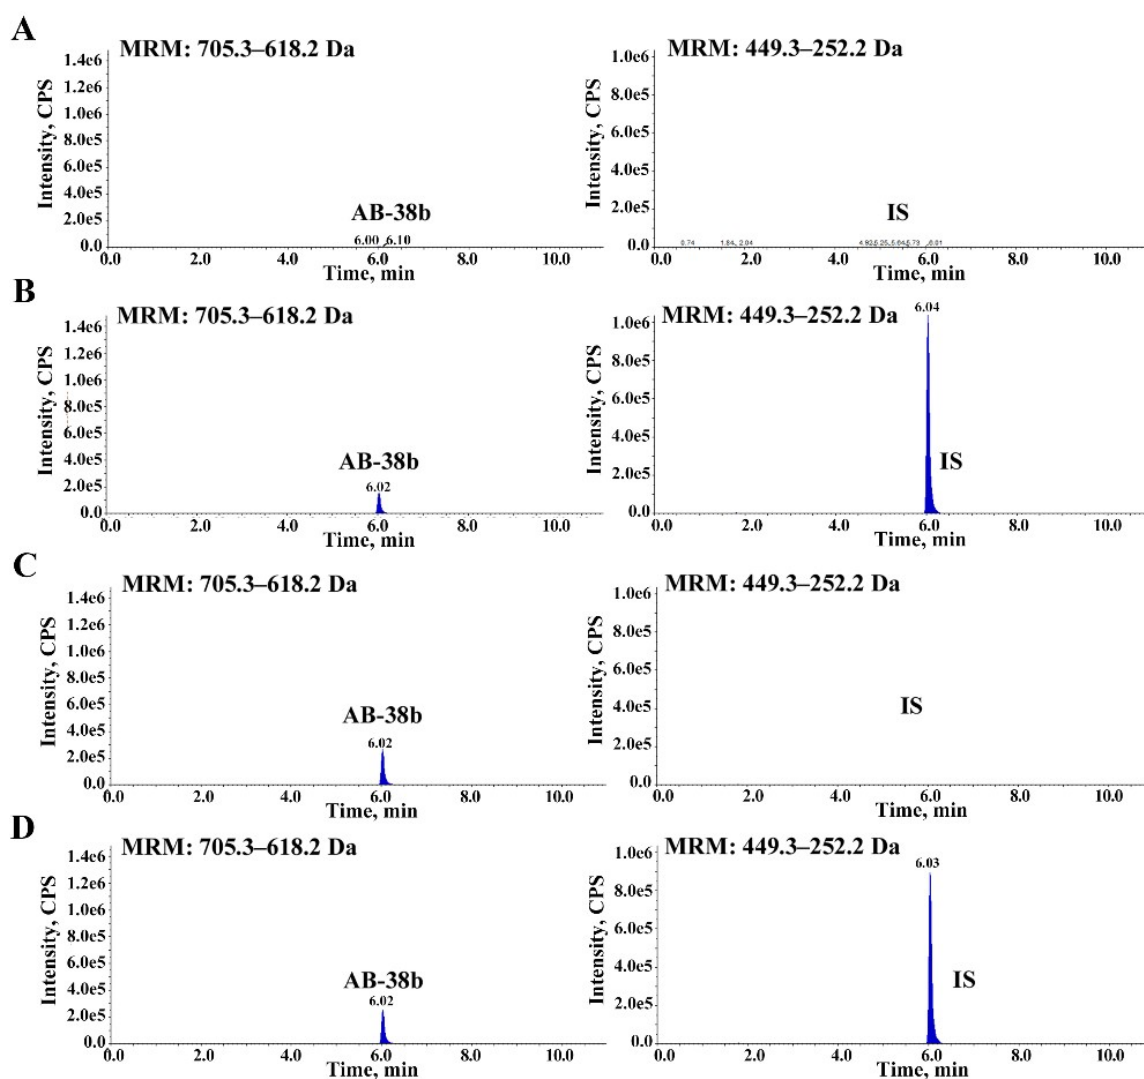

**Figure.S3 Typical MRM chromatogram of AB-38b and IS (Tolvaptan) in the kidney of rats. (A) A double blank sample; (B) A zero sample (blank sample spiked with IS); (C) Kidney tissue homogenate sample spiked with AB-38b; (D) AB-38b at LLOQ with IS.**

**Table S1. Linear ranges, calibration curves, correlation coefficient and lower limits of quantification of AB-38b in different mixed matrices of rats (n = 5).**

| Sample | Tissue | Linear range (ng/mL) | Calibration curves   | R <sup>2</sup> | LLOQ |
|--------|--------|----------------------|----------------------|----------------|------|
| AB-38b | Liver  | 2.5-150              | $Y = 0.057X + 0.085$ | 0.994          | 2.5  |
|        | Kidney | 2.5-150              | $Y = 0.067X + 0.161$ | 0.996          | 2.5  |

**Table S2. Within-run and Between-run precision and accuracy for AB-38b in different mixed matrices of rats (n = 5).**

| Tissue | QC level | Concentration added (ng/mL) | Within-run (n = 5)                         |                 |                  | Between-run (n = 15)                       |                 |                  |
|--------|----------|-----------------------------|--------------------------------------------|-----------------|------------------|--------------------------------------------|-----------------|------------------|
|        |          |                             | Concentration Measured (ng/mL) (mean ± SD) | Accuracy (RE %) | Precision (CV %) | Concentration Measured (ng/mL) (mean ± SD) | Accuracy (RE %) | Precision (CV %) |
| Liver  | LLOQ     | 2.5                         | 2.65 ± 0.14                                | 5.36            | 3.72             | 2.60 ± 0.08                                | 4.16            | 3.11             |
|        | LQC      | 5                           | 5.06 ± 0.14                                | 1.80            | 2.82             | 5.14 ± 0.17                                | 2.71            | 3.39             |
|        | MQC      | 25                          | 24.40 ± 1.89                               | -2.40           | 7.75             | 25.59 ± 0.69                               | 2.35            | 2.69             |
|        | HQC      | 100                         | 97.26 ± 2.61                               | -2.74           | 2.68             | 101.99 ± 2.12                              | 1.99            | 2.08             |
| Kidney | LLOQ     | 2.5                         | 2.53 ± 0.30                                | 1.36            | 11.89            | 2.59 ± 0.13                                | 0.48            | 4.84             |
|        | LQC      | 5                           | 4.58 ± 0.22                                | -8.48           | 4.91             | 5.18 ± 0.09                                | 0.72            | 1.68             |
|        | MQC      | 25                          | 24.72 ± 2.80                               | -1.12           | 11.35            | 26.61 ± 1.05                               | 8.80            | 3.96             |
|        | HQC      | 100                         | 101.10 ± 5.90                              | 1.10            | 5.84             | 104.13 ± 5.36                              | 0.44            | 5.15             |

**Table S3. Extraction recoveries of AB-38b in different mixed matrices of rats (n = 5).**

| Tissue | QC level | Concentration added (ng/mL) | Extraction recovery (n = 5)  |                  |
|--------|----------|-----------------------------|------------------------------|------------------|
|        |          |                             | Recovery (mean $\pm$ SD) (%) | Precision (CV %) |
| Liver  | LQC      | 5                           | 84.33 $\pm$ 2.90             | 3.44             |
|        | MQC      | 25                          | 94.46 $\pm$ 8.61             | 9.12             |
|        | HQC      | 100                         | 96.44 $\pm$ 7.97             | 8.27             |
|        | IS       | 200                         | 99.64 $\pm$ 9.30             | 9.33             |
| Kidney | LQC      | 5                           | 83.52 $\pm$ 8.17             | 9.78             |
|        | MQC      | 25                          | 97.80 $\pm$ 8.45             | 8.63             |
|        | HQC      | 100                         | 97.47 $\pm$ 5.99             | 6.15             |
|        | IS       | 200                         | 98.61 $\pm$ 11.24            | 11.40            |



**Table S4. Matrix effect of AB-38b in different mixed matrices of rats (n = 5).**

| Tissue | QC level | Between 6 different batches of rats |                                                      |                     |
|--------|----------|-------------------------------------|------------------------------------------------------|---------------------|
|        |          | Concentration added<br>(ng/mL)      | Concentration Measured<br>(ng/mL)<br>(mean $\pm$ SD) | Precision<br>(CV %) |
| Liver  | LQC      | 5                                   | 85.69 $\pm$ 5.43                                     | 6.34                |
|        | MQC      | 25                                  | 85.66 $\pm$ 2.27                                     | 2.65                |
|        | HQC      | 100                                 | 86.15 $\pm$ 1.28                                     | 1.49                |
| Kidney | LQC      | 5                                   | 86.62 $\pm$ 2.64                                     | 3.04                |
|        | MQC      | 25                                  | 98.72 $\pm$ 7.20                                     | 7.29                |
|        | HQC      | 100                                 | 98.48 $\pm$ 9.78                                     | 9.94                |

**Table S5. Dilution reliability of AB-38b in rat liver homogenate samples with high concentration (n = 6).**

| Tissue | Concentration added (ng/mL) | Dilution Factor | Concentration Measured     | CV (%) |
|--------|-----------------------------|-----------------|----------------------------|--------|
|        |                             |                 | (ng/mL)<br>(mean $\pm$ SD) |        |
| Liver  | 500                         | 5               | 102.03 $\pm$ 3.23          | 3.16   |

**Table S6. The ratio of the upper limit of quantitation to the peak area of AB-38b or IS in blank rat plasma or tissue samples (n = 3).**

| Sample | Tissue | AB-38b Area |          |       | IS Area  |          |      |
|--------|--------|-------------|----------|-------|----------|----------|------|
|        |        | ULOQ        | Blank    | %     | ULOQ     | Blank    | %    |
| AB-38b | Plasma | 1.68E+07    | 1.19E+05 | 15.73 | 2.90E+06 | 3.70E+02 | 0.01 |
|        | Liver  | 3.03E+07    | 5.58E+04 | 9.48  | 4.02E+06 | 1.35E+03 | 0.03 |
|        | Kidney | 2.79E+07    | 2.04E+05 | 16.01 | 3.15E+06 | 6.36E+02 | 0.02 |

**Table S7. The stability of AB-38b in different mixed matrices of rats under various storage conditions (n = 5).**

| Tissue | Storage conditions                                           | QC level | Concentration added<br>(ng/mL) | Concentration Measured<br>(ng/mL) (mean $\pm$ SD) | Accuracy<br>(RE%) | Precision<br>(CV%) |
|--------|--------------------------------------------------------------|----------|--------------------------------|---------------------------------------------------|-------------------|--------------------|
| Liver  | Injector stability<br>(24 h at 4 °C)                         | LQC      | 5                              | 4.58 $\pm$ 0.40                                   | -8.40             | 8.65               |
|        |                                                              | MQC      | 25                             | 24.68 $\pm$ 1.81                                  | -1.28             | 7.32               |
|        |                                                              | HQC      | 100                            | 93.04 $\pm$ 6.05                                  | -6.96             | 6.50               |
|        | short-term temperature stability<br>(12 h, room temperature) | LQC      | 5                              | 5.17 $\pm$ 0.27                                   | 3.44              | 5.24               |
|        |                                                              | MQC      | 25                             | 24.36 $\pm$ 0.95                                  | -2.56             | 3.89               |
|        |                                                              | HQC      | 100                            | 93.88 $\pm$ 4.97                                  | -6.12             | 5.30               |
|        | Freeze-thaw stability<br>(3 cycles at -20 °C)                | LQC      | 5                              | 4.74 $\pm$ 0.13                                   | -5.16             | 2.78               |
|        |                                                              | MQC      | 25                             | 25.10 $\pm$ 0.44                                  | 0.40              | 1.76               |
|        |                                                              | HQC      | 100                            | 95.16 $\pm$ 3.01                                  | -4.84             | 3.16               |
|        | Long-term stability<br>(60 days at -80 °C)                   | LQC      | 5                              | 5.49 $\pm$ 0.19                                   | 9.80              | 3.49               |
|        |                                                              | MQC      | 25                             | 26.58 $\pm$ 1.93                                  | 6.32              | 7.27               |
|        |                                                              | HQC      | 100                            | 104.80 $\pm$ 5.81                                 | 4.80              | 5.54               |
|        | Injector stability<br>(24 h at 4 °C)                         | LQC      | 5                              | 4.93 $\pm$ 0.37                                   | -1.48             | 7.51               |
|        |                                                              | MQC      | 25                             | 27.04 $\pm$ 1.22                                  | 8.16              | 4.50               |
|        |                                                              | HQC      | 100                            | 102.32 $\pm$ 8.74                                 | 2.32              | 8.54               |
| Kidney | short-term temperature stability<br>(12 h, room temperature) | LQC      | 5                              | 4.61 $\pm$ 0.37                                   | -7.84             | 8.13               |
|        |                                                              | MQC      | 25                             | 25.46 $\pm$ 1.84                                  | 1.84              | 7.21               |
|        |                                                              | HQC      | 100                            | 101.88 $\pm$ 7.72                                 | 1.88              | 7.58               |
|        | Freeze-thaw stability<br>(3 cycles at -20 °C)                | LQC      | 5                              | 5.27 $\pm$ 0.23                                   | 5.40              | 4.45               |
|        |                                                              | MQC      | 25                             | 25.42 $\pm$ 1.66                                  | 1.68              | 6.55               |
|        |                                                              | HQC      | 100                            | 93.10 $\pm$ 4.87                                  | -6.90             | 5.23               |
|        | Long-term stability<br>(60 days at -80 °C)                   | LQC      | 5                              | 4.77 $\pm$ 0.35                                   | -4.52             | 7.38               |
|        |                                                              | MQC      | 25                             | 24.52 $\pm$ 1.50                                  | -1.92             | 6.10               |
|        |                                                              | HQC      | 100                            | 87.74 $\pm$ 2.32                                  | -12.26            | 2.64               |

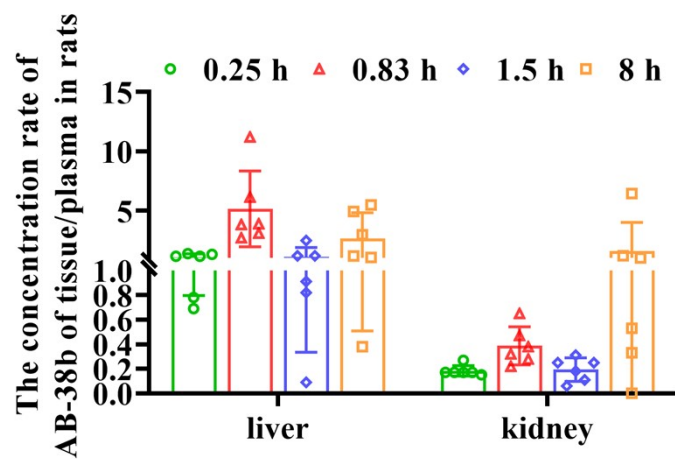

**Figure.S4** The concentration rate of AB-38b of tissue/plasma in rats. The rats were given a single oral dose of 50 mg/kg (n = 6).
